# Supplementary material for: Impact of DNA extraction method and targeted 16S-rRNA hypervariable region on oral microbiota profiling
Source: PubMed Central journal article supplement (PMC6218491; doi:10.1038/s41598-018-34294-x), 2018-11-05
Supplement: 41598_2018_34294_MOESM1_ESM.pdf [file 41598_2018_34294_MOESM1_ESM.pdf]

**Impact of DNA extraction method and targeted 16S-rRNA hypervariable region on oral microbiota profiling**

Fei Teng<sup>1,4,\*</sup>, Sree Sankar<sup>1,4</sup>, Pengfei Zhu<sup>1</sup>, Shanshan Li<sup>2</sup>, Shi Huang<sup>1</sup>, Xiaolan Li<sup>3</sup>, Jian Xu<sup>1</sup>  
and Fang Yang<sup>2,\*</sup>

# Cluster Dendrogram

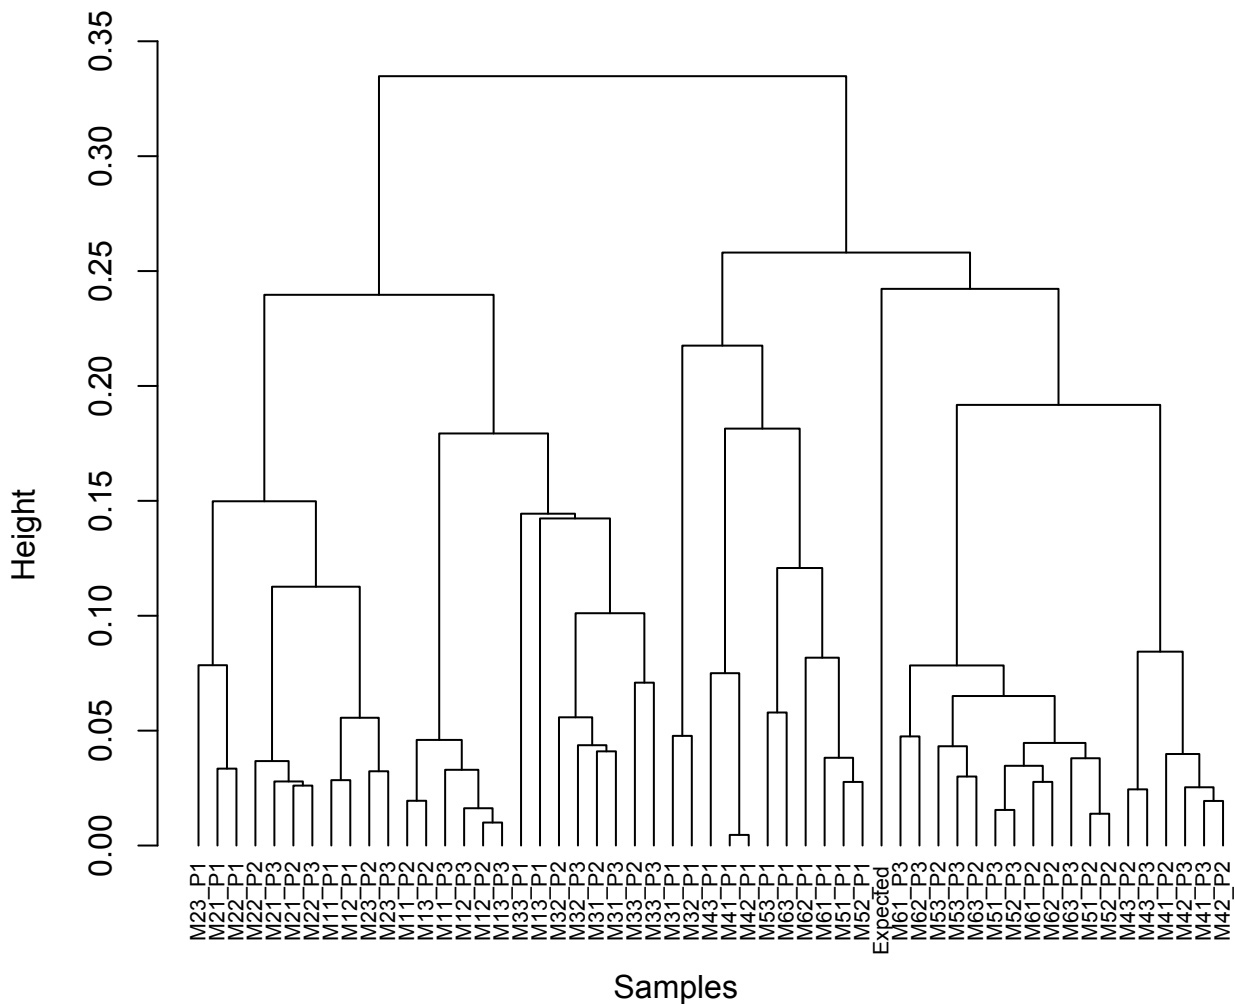

1 **Figure S1. Hierarchical clustering of the microbial profiles obtained using different**  
2 **experimental protocols.** Bray–Curtis dissimilarity was calculated using the relative  
3 abundance taxa at the species level. Based on the dissimilarity, the hierarchical clustering  
4 analysis was performed using the complete linkage algorithm. Protocols that included  
5 enzymatic-mechanical-lysis steps in DNA extraction procedure (e.g., M5 and M6) were  
6 clustered with the expected microbiome structure, thus they produced better microbial diversity  
7 representation than those without the extra steps in the procedure (e.g., M1, M2, and M3).  
8 Moreover, samples from P2 (V3\_V4) and P3 (V4\_V5) tended to cluster closely to the expected  
9 microbial structure.
